# Supplementary material
Source: Research Square preprint supplement (doi:10.21203/rs.3.rs-10047739/v1)
Supplement: Supplementary file 1 [file 81a740084b5b8a4f62bf91c1.docx]

Supplementary Materials

Table S1: Distribution of waterbirds across disturbance categories

| Taxa | Common Name | Code | FH | FM | GZ | HS | LB | OW |
| --- | --- | --- | --- | --- | --- | --- | --- | --- |
| *Ciconia abdimi* | Adbim's Stork | ADSTO |  |  | 4 |  | 1 |  |
| *Anhinga rufa* | African Darter | AFDAR | 2 |  |  |  |  |  |
| *Haliaeetus vocifer* | African Fish Eagle | AFFEA | 2 |  | 2 |  |  |  |
| *Actophilornis africana* | African Jacana | AFJAC | 274 | 116 | 457 | 68 | 95 | 39 |
| *Anastomus lamelligerus* | African Openbill Stork | AFOST | 6 | 31 | 361 | 160 |  |  |
| *Nettapus auritus* | African Pygmy Goose | AFPGO |  |  | 2 |  |  | 9 |
| *Ceyx pictus* | African Pygmy Kingfisher | AFPKI | 6 |  |  |  |  |  |
| *Vanellus senegallus* | African Wattled Lapwing | AFWLA |  | 4 |  |  |  |  |
| *Porphyrio alleni* | Allen's Gallinule | ALGAL |  | 1 |  | 1 |  |  |
| *Amaurornis flavirostra* | Black Crake | BLCRA | 12 |  | 10 | 5 | 9 | 18 |
| *Limosa limosa* | Black-Tailed Godwit | BLGOD |  |  | 3 |  |  |  |
| *Egretta ardesiaca* | Black Heron | BLHER | 125 | 25 | 150 |  | 49 | 8 |
| *Ardea melanocephala* | Black-Headed Heron | BLHHE | 16 | 1 | 11 |  |  |  |
| *Vanellus tectus* | Black-Headed Lapwing | BLLAP | 8 |  | 12 | 4 | 13 |  |
| *Himantopus himantopus* | Black-Winged Stilt | BLSTI | 57 | 165 | 24 |  | 30 | 30 |
| *Ciconia nigra* | Black Stork | BLSTO |  |  | 16 |  |  |  |
| *Vanellus superciliosus* | Brown-Chested Lapwing | BRLAP |  | 6 |  | 2 | 4 |  |
| *Bubulcus ibis* | Cattle Egret | CAEGR | 452 | 303 | 625 | 41 | 137 | 25 |
| *Tringa nebularia* | Common Greenshank | COGRE | 8 | 13 | 49 | 3 |  | 2 |
| *Gallinula chloropus* | Common Moorhen | COMOO | 27 |  | 4 | 2 | 12 | 9 |
| *Tringa totanus* | Common Redshank | CORED | 4 |  | 1 |  | 2 | 4 |
| *Charadrius hiaticula* | Common Ringed Plover | CORPL | 6 |  | 13 |  |  |  |
| *Actitis hypoleucos* | Common Sandpiper | COSAN | 100 | 23 | 168 | 12 | 42 | 4 |
| *Gallinago gallinago* | Common Snipe | COSNI |  | 2 | 4 |  |  |  |
| *Alopochen aegyptiaca* | Egyptian Goose | EGGOO |  | 16 | 11 |  |  |  |
| *Fulica atra* | Eurasian Coot | EUCOO | 8 |  | 6 |  | 6 | 2 |
| *Aythya nyroca* | Ferruginous Duck | FEDUC | 6 | 3 | 15 |  |  |  |
| *Dendrocygna bicolor* | Fulvous Whistling Duck | FUWDU | 122 | 70 | 461 | 31 |  |  |
| *Anas querquedula* | Garganey | GARGA | 8 | 35 | 135 | 14 | 24 |  |
| *Pelagadis falcinellus* | Glossy Ibis | GLIBI | 42 | 14 | 92 |  |  |  |
| *Ardea goliath* | Goliath Heron | GOHER |  |  | 6 |  |  |  |
| *Butorides striata* | Vanellus spinosus | GRBHE | 13 | 1 | 34 | 7 |  |  |
| *Egretta alba* | Great Egret | GREGR | 53 | 3 | 32 | 7 | 3 | 2 |
| *Ardea cinerea* | Grey Heron | GRHER | 22 | 4 | 151 | 2 | 7 | 5 |
| *Tringa ochropus* | Green Sandpiper | GRSAN | 31 | 11 | 82 | 2 | 12 | 2 |
| *Gallinago media* | Great Snipe | GRSNI |  | 7 | 7 |  |  |  |
| *Bostrychia hagedash* | Hadada Ibis | HAIBI |  | 8 | 52 | 19 |  |  |
| *Scopus umbretta* | Hamerkop | HAMER | 7 | 6 | 30 | 8 |  |  |
| *Egretta intermedia* | Intermediate Egret | INEGR | 176 | 93 | 351 | 63 | 96 | 9 |
| *Charadrius alexandrinus* | Kentish Plover | KEPLO | 27 | 7 |  |  |  |  |
| *Charadrius pecuarius* | Kittlitz's Plover | KIPLO | 17 | 3 | 2 |  |  |  |
| *Sarkidiornis melanotos* | Knob-Billed Duck | KNDUC |  | 4 | 83 | 3 |  |  |
| *Microparra capensis* | Lesser Jacana | LEJAC | 21 | 2 | 9 |  |  |  |
| *Gallinula angulata* | Lesser Moorhen | LEMOO | 2 | 2 |  |  |  |  |
| *Egretta garzetta* | Little Egret | LIEGR | 72 | 33 | 94 | 21 | 30 | 9 |
| *Tachybaptus ruficollis* | Little Grebe | LIGRE | 2 | 7 | 2 |  |  |  |
| *Calidris minuta* | Little Stint | LISTI |  | 6 | 17 |  |  |  |
| *Phalacrocorax africanus* | Long-Tailed Cormorant | LOCOR | 319 | 78 | 301 | 64 | 131 | 11 |
| *Alcedo cristata* | Malachite Kingfisher | MAKIN | 6 |  | 4 | 7 | 2 |  |
| *Tringa stagnatilis* | Marsh Sandpiper | MASAN | 18 |  | 50 |  | 2 |  |
| *Leptoptilos crumeniferus* | Marabou Stork | MASTO |  | 5 | 12 |  |  |  |
| *Anas acuta* | Northern Pintail | NOPIN | 6 |  | 22 |  |  |  |
| *Pandion haliatus* | Osprey | OSPRE | 3 | 1 | 3 |  |  |  |
| *Ceryle rudis* | Pied Kingfisher | PIKIN | 125 | 36 | 206 | 43 | 59 | 14 |
| *Ardea purpurea* | Purple Heron | PUHER | 45 | 17 | 43 |  | 14 |  |
| *Porphyrio porphyrio* | Purple Swamphen | PUSWA | 4 |  | 6 | 4 | 6 | 4 |
| *Philomachus pugnax* | Ruff | RUFF | 148 | 156 | 558 | 73 | 71 | 23 |
| *Threskiornis aethiopica* | Sacred Ibis | SAIBI | 26 |  | 21 |  |  |  |
| *Burhinus senegalensis* | Senegal Thick-Knee | SETHI | 4 | 2 | 3 |  | 7 |  |
| *Plectropterus gambensis* | Spur-Winged Goose | SPGOO |  | 11 | 132 | 2 |  |  |
| *Vanellus spinosus* | Spur-Winged Lapwing | SPLAP | 188 | 99 | 341 | 27 | 71 | 17 |
| *Tringa erythropus* | Spotted Redshank | SPRED | 4 | 4 | 21 | 2 | 7 |  |
| *Ardeola ralloides* | Squacco Heron | SQHER | 97 | 34 | 191 | 25 | 31 | 19 |
| *Charadrius tricollaris* | Three-Banded Plover | THPLO |  | 2 | 7 |  | 3 |  |
| *Aythya fuligula* | Tufted Duck | TUDUC |  | 22 | 15 | 2 |  |  |
| *Ciconia ciconia* | White Stork | WHSTO |  | 28 | 14 |  |  |  |
| *Dendrocygna viduata* | White-Faced Whistling Duck | WHWDU | 965 | 589 | 1453 | 212 | 252 | 58 |
| *Tringa glareola* | Wood Sandpiper | WOSAN | 22 |  | 26 | 15 | 2 |  |
| *Mycteria ibis* | Yellow-Billed Stork | YESTO | 16 |  | 4 | 8 |  |  |
| *Motacilla flava* | Yellow Wagtail | YEWAG | 67 | 125 | 128 | 12 | 17 | 29 |
| Total |  |  | 3797 | 2234 | 7149 | 971 | 1247 | 352 |

Table S2: ADI values derived from the product of wetland area and % intensity

| Zone | Zone code | Season | Biome | N | E | HA | WA | % intensity | ADI |
| --- | --- | --- | --- | --- | --- | --- | --- | --- | --- |
| Yobe | SH_1 | Dry | Sahel | 12.82176 | 10.74617 | GZ | 0.01 | 4.89 | 0.06 |
| Yobe | SH_2 | Dry | Sahel | 12.8182 | 10.74408 | GZ | 0.01 | 4.89 | 0.06 |
| Yobe | SH_3 | Dry | Sahel | 12.81505 | 10.74105 | GZ | 0.02 | 4.89 | 0.11 |
| Yobe | SH_4 | Dry | Sahel | 12.81067 | 10.74201 | GZ | 0.02 | 4.89 | 0.09 |
| Yobe | SH_5 | Dry | Sahel | 12.81569 | 10.74715 | GZ | 0.01 | 4.89 | 0.06 |
| Yobe | SH_6 | Dry | Sahel | 12.81921 | 10.75034 | FH | 0.01 | 5.97 | 0.08 |
| Yobe | SH_7 | Dry | Sahel | 12.76912 | 10.71059 | FH | 0.01 | 5.97 | 0.07 |
| Yobe | SH_8 | Dry | Sahel | 12.78175 | 10.70766 | GZ | 0.02 | 4.89 | 0.08 |
| Yobe | SH_9 | Dry | Sahel | 12.76287 | 10.66653 | GZ | 0.01 | 4.89 | 0.04 |
| Yobe | SH_10 | Dry | Sahel | 12.76594 | 10.66905 | FM | 0.01 | 65.48 | 0.65 |
| Yobe | SH_11 | Dry | Sahel | 12.76497 | 10.67284 | HS | 0.01 | 11.09 | 0.11 |
| Yobe | SH_12 | Dry | Sahel | 12.76358 | 10.67624 | HS | 0.01 | 11.09 | 0.11 |
| Yobe | SH_13 | Dry | Sahel | 12.76275 | 10.68149 | HS | 0.02 | 11.09 | 0.20 |
| Yobe | SH_14 | Dry | Sahel | 12.8067 | 10.68199 | FM | 0.03 | 65.48 | 1.64 |
| Yobe | SH_15 | Dry | Sahel | 12.74467 | 10.66628 | GZ | 0.02 | 4.89 | 0.08 |
| Jigawa | SH_16 | Dry | Sahel | 12.48998 | 10.26691 | LB | 0.01 | 8 | 0.06 |
| Jigawa | SH_17 | Dry | Sahel | 12.47626 | 10.27974 | FH | 0.02 | 5.97 | 0.12 |
| Jigawa | SH_18 | Dry | Sahel | 12.48227 | 10.28375 | FH | 0.00 | 5.97 | 0.02 |
| Jigawa | SH_19 | Dry | Sahel | 12.48181 | 10.28392 | LB | 0.00 | 8 | 0.03 |
| Jigawa | SH_20 | Dry | Sahel | 12.50719 | 10.42714 | LB | 0.02 | 8 | 0.14 |
| Jigawa | SH_21 | Dry | Sahel | 12.51516 | 10.43054 | FH | 0.02 | 5.97 | 0.11 |
| Jigawa | SH_22 | Dry | Sahel | 12.50998 | 10.42992 | OW | 0.02 | 4.75 | 0.08 |
| Jigawa | SH_23 | Dry | Sahel | 12.48655 | 10.31446 | GZ | 0.03 | 4.89 | 0.16 |
| Jigawa | SH_24 | Dry | Sahel | 12.49195 | 10.31104 | GZ | 0.01 | 4.89 | 0.05 |
| Jigawa | SH_25 | Dry | Sahel | 12.48023 | 10.27322 | FH | 0.02 | 5.97 | 0.09 |
| Jigawa | SH_26 | Dry | Sahel | 12.50829 | 10.41307 | GZ | 0.02 | 4.89 | 0.08 |
| Jigawa | SH_27 | Dry | Sahel | 12.51514 | 10.41886 | LB | 0.02 | 8 | 0.12 |
| Jigawa | SH_28 | Dry | Sahel | 12.48181 | 10.29018 | FM | 0.03 | 65.48 | 1.64 |
| Yobe | SH_1 | Wet | Sahel | 12.82176 | 10.74617 | FH | 0.01 | 5.97 | 0.05 |
| Yobe | SH_2 | Wet | Sahel | 12.8182 | 10.74408 | FH | 0.01 | 5.97 | 0.05 |
| Yobe | SH_3 | Wet | Sahel | 12.81505 | 10.74105 | FH | 0.02 | 5.97 | 0.13 |
| Yobe | SH_4 | Wet | Sahel | 12.81067 | 10.74201 | FH | 0.01 | 5.97 | 0.07 |
| Yobe | SH_5 | Wet | Sahel | 12.81569 | 10.74715 | FH | 0.01 | 5.97 | 0.05 |
| Yobe | SH_6 | Wet | Sahel | 12.81921 | 10.75034 | FH | 0.01 | 5.97 | 0.05 |
| Yobe | SH_7 | Wet | Sahel | 12.76912 | 10.71059 | FH | 0.01 | 5.97 | 0.04 |
| Yobe | SH_8 | Wet | Sahel | 12.78175 | 10.70766 | GZ | 0.01 | 4.89 | 0.05 |
| Yobe | SH_9 | Wet | Sahel | 12.76287 | 10.66653 | GZ | 0.01 | 4.89 | 0.03 |
| Yobe | SH_10 | Wet | Sahel | 12.76594 | 10.66905 | FM | 0.01 | 65.48 | 0.39 |
| Yobe | SH_11 | Wet | Sahel | 12.76497 | 10.67284 | HS | 0.01 | 11.09 | 0.07 |
| Yobe | SH_12 | Wet | Sahel | 12.76358 | 10.67624 | HS | 0.01 | 11.09 | 0.07 |
| Yobe | SH_13 | Wet | Sahel | 12.76275 | 10.68149 | HS | 0.01 | 11.09 | 0.12 |
| Yobe | SH_14 | Wet | Sahel | 12.8067 | 10.68199 | FM | 0.02 | 65.48 | 1.05 |
| Yobe | SH_15 | Wet | Sahel | 12.74467 | 10.66628 | FH | 0.01 | 5.97 | 0.07 |
| Jigawa | SH_16 | Wet | Sahel | 12.48998 | 10.26691 | GZ | 0.01 | 4.89 | 0.02 |
| Jigawa | SH_17 | Wet | Sahel | 12.47626 | 10.27974 | FM | 0.01 | 65.48 | 0.85 |
| Jigawa | SH_18 | Wet | Sahel | 12.48227 | 10.28375 | OW | 0.00 | 4.75 | 0.01 |
| Jigawa | SH_19 | Wet | Sahel | 12.48181 | 10.28392 | FH | 0.00 | 5.97 | 0.01 |
| Jigawa | SH_20 | Wet | Sahel | 12.50719 | 10.42714 | FH | 0.01 | 5.97 | 0.07 |
| Jigawa | SH_21 | Wet | Sahel | 12.51516 | 10.43054 | OW | 0.01 | 4.75 | 0.05 |
| Jigawa | SH_22 | Wet | Sahel | 12.50998 | 10.42992 | OW | 0.01 | 4.75 | 0.05 |
| Jigawa | SH_23 | Wet | Sahel | 12.48655 | 10.31446 | FH | 0.02 | 5.97 | 0.13 |
| Jigawa | SH_24 | Wet | Sahel | 12.49195 | 10.31104 | GZ | 0.01 | 4.89 | 0.03 |
| Jigawa | SH_25 | Wet | Sahel | 12.48023 | 10.27322 | FH | 0.01 | 5.97 | 0.06 |
| Jigawa | SH_26 | Wet | Sahel | 12.50829 | 10.41307 | LB | 0.01 | 8 | 0.09 |
| Jigawa | SH_27 | Wet | Sahel | 12.51514 | 10.41886 | FH | 0.01 | 5.97 | 0.06 |
| Jigawa | SH_28 | Wet | Sahel | 12.48181 | 10.29018 | FH | 0.02 | 5.97 | 0.10 |

Table S3: Distance-based Moran’s eigenvector maps (dbMEM) extracted via spatial eigenvalue analysis

| MEM1 | MEM2 |
| --- | --- |
| -1.12399 | 0.263612 |
| -1.10802 | 0.195774 |
| -1.09 | 0.16777 |
| -1.08198 | -0.01146 |
| -1.11172 | 0.024724 |
| -1.13121 | 0.06133 |
| -0.87242 | -0.61265 |
| -0.89502 | -0.09143 |
| -0.71137 | 0.363644 |
| -0.72751 | 0.402682 |
| -0.73751 | 0.26597 |
| -0.74516 | 0.125144 |
| -0.76033 | -0.04627 |
| -0.87419 | 1.477413 |
| -0.66408 | -0.26616 |
| 1.301364 | 1.656424 |
| 1.294146 | 0.828591 |
| 1.265595 | 0.930052 |
| 1.26621 | 0.909352 |
| 0.729778 | -2.08704 |
| 0.698232 | -1.90048 |
| 0.7135 | -2.06485 |
| 1.153538 | 0.246902 |
| 1.151012 | 0.528527 |
| 1.30548 | 1.144271 |
| 0.773303 | -1.66699 |
| 0.736746 | -1.58442 |
| 1.245596 | 0.739582 |
| -1.12399 | 0.263612 |
| -1.10802 | 0.195774 |
| -1.09 | 0.16777 |
| -1.08198 | -0.01146 |
| -1.11172 | 0.024724 |
| -1.13121 | 0.06133 |
| -0.87242 | -0.61265 |
| -0.89502 | -0.09143 |
| -0.71137 | 0.363644 |
| -0.72751 | 0.402682 |
| -0.73751 | 0.26597 |
| -0.74516 | 0.125144 |
| -0.76033 | -0.04627 |
| -0.87419 | 1.477413 |
| -0.66408 | -0.26616 |
| 1.301364 | 1.656424 |
| 1.294146 | 0.828591 |
| 1.265595 | 0.930052 |
| 1.26621 | 0.909352 |
| 0.729778 | -2.08704 |
| 0.698232 | -1.90048 |
| 0.7135 | -2.06485 |
| 1.153538 | 0.246902 |
| 1.151012 | 0.528527 |
| 1.30548 | 1.144271 |
| 0.773303 | -1.66699 |
| 0.736746 | -1.58442 |
| 1.245596 | 0.739582 |

Table S4: Unique fractions of environmental data for total beta-diversity and its components

| Env. Data | Sorensen | Simpson | Nestedness |
| --- | --- | --- | --- |
| SPC | 0.054 | 0.066 | -0.014 |
| CLC | 0.052 | 0.051 | 0.019 |
| ENC | 0.026 | -0.001 | 0.095 |
| ANC | 0.012 | 0.009 | 0.002 |

Table S5: Contributed fractions of environmental data for total beta-diversity and its components

| Env. Data | Sorensen | Simpson | Nestedness |
| --- | --- | --- | --- |
| SPC | 0.077 | 0.100 | -0.028 |
| CLC | 0.154 | 0.157 | 0.124 |
| ENC | 0.125 | 0.094 | 0.237 |
| ANC | 0.012 | 0.011 | -0.001 |
